# Supplementary material for: An unusual triple parallel interpenetrated 2D Cu-polymer, with a 3D triple interpenetration via H-bonding
Source: Royal Society of Chemistry journal article supplement (doi:10.1039/b709457d), 2007-01-01
Supplement: b709457d.pdf [file b709457d.pdf]

# Supporting Information

## **An unusual triple parallel interpenetrated 2D Cu-polymer, with a 3D triple interpenetration via H-bonding**

**Pilar Amo-Ochoa<sup>a,b</sup>, Pablo J. Sanz Miguel<sup>a</sup>, Oscar Castillo<sup>c</sup>, Félix Zamora<sup>a\*</sup>**

<sup>a</sup> *Departamento de Química Inorgánica, Universidad Autónoma de Madrid, 28049 Madrid, Spain. Fax: 34 91 4974833; E-mail: felix.zamora@uam.es*

<sup>b</sup> *Departamento de Tecnología Industrial, Universidad Alfonso X “El Sabio”, 28691 Villanueva de la Cañada, Madrid (Spain).*

<sup>c</sup> *Departamento de Química Inorgánica, Facultad de Ciencia y Tecnología, Universidad del País Vasco, Apartado 644, E-48080 Bilbao (Spain).*

## Experimental Section

**Materials.** All chemicals were of reagent grade and were used as commercially obtained. FTIR spectra (KBr pellets) were recorded on a Perkin-Elmer 1650 spectrophotometer. Elemental analyses were performed on a Perkin-Elmer 240-B microanalyzer.

**Synthesis and Characterization of  $[\text{Cu}_2(\text{CN})(\text{IN})(\text{HIN})]_n$  (1):** A mixture of CuCN (0.800 g, 8.94 mmol), isonicotinic acid (HIN) (2.200 g, 17.86 mmol) and  $\text{H}_2\text{O}$  (8 mL) was stirred at room temperature and the pH adjusted to 2.2 with  $\text{HNO}_3$  (0.1 mol/L). Then, the mixture was sealed in a 23 mL teflon-lined autoclave and heated at 180 °C for 4 days. Afterwards, the autoclave was slowly cooled up to 20 °C. The resulting yellow crystals were filtered off, washed with water and dried in air. (0.500 g, 28.1 % yield). *Anal.* Calcd (found) for  $\text{C}_{13}\text{H}_9\text{Cu}_2\text{N}_3\text{O}_4$ : C, 39.17 (37.85); H, 2.26 (2.18); N, 10.54 (10.77). IR (KBr,  $\text{cm}^{-1}$ ): 3431s; 2150m; 1720m; 1614s; 1606s; 1412s; 1384s; 1230s; 1053w; 881w; 765m; 746m, 683m.

**X-ray Data Collection and Structure Determination.** Data collections on single crystals of compound **1** were carried out with an Xcalibur diffractometer equipped with an area detector and graphite monochromated Mo  $\text{K}\alpha$  radiation ( $\lambda = 0.71069 \text{ \AA}$ ). The data reduction was done with the CrysAlis RED program [S1]. Data were corrected for Lorentz and polarization effects. The structures were solved by direct methods using the SIR 97 program [S2]. Full matrix least squares refinements were performed on  $F^2$  using SHELXL97 [S3]. All non-hydrogen atoms were refined anisotropically. The cyanide bridge was modeled as disordered with C/N composites, occupancy 0.5 each. The hydrogen atoms belonging to the aromatic rings were placed in geometrically calculated positions and treated as riding on their parents atoms [C-H: 0.93  $\text{Å}$  and

$U_{\text{iso}}(\text{H})=1.2U_{\text{eq}}(\text{C})$ . The hydrogen atom of the carboxylic group was located in the Fourier difference map and isotropically refined. All calculations were performed using the WinGX crystallographic software package [S4]. The final geometrical calculations and the graphical manipulations were carried out with the PARST95 [S5] and PLATON [S6] programs. Summaries of crystal data collection and refinement parameters are given in Table S1.

## References

- [S1] *CrysAlis RED*, version 1.170; Oxford Diffraction: Wroclaw, Poland, 2003.
- [S2] A. Altomare, M. C. Burla, M. Camalli, G. L. Cascarano, C. Giacovazzo, A. Guagliardi, A. G. G. Moliterni, G. Polidori and R. Spagna, *J. Appl. Crystallogr.*, 1999, 32, 115-119.
- [S3] G. M. Sheldrick, *SHELXL97*; University of Göttingen:, Germany, 1997.
- [S4] L. J. Farrugia, *WINGX. A Windows program for crystal structure analysis*; University of Glasgow, U.K., 1998.
- [S5] M. J. Nardelli, *Appl. Crystallogr.*, 1995, 28, 659-673.
- [S6] A. L. Spek, *PLATON, A multipurpose crystallographic tool*; Utrecht University, The Netherlands, 1998.

**Table S1.** Crystal data, data collection, and structure refinement for compound **1**.

|                                                       |                                                                              |
|-------------------------------------------------------|------------------------------------------------------------------------------|
| empirical formula                                     | C <sub>13</sub> H <sub>9</sub> Cu <sub>2</sub> N <sub>3</sub> O <sub>4</sub> |
| formula weight                                        | 398.32                                                                       |
| crystal system                                        | monoclinic                                                                   |
| space group                                           | Pc                                                                           |
| <i>a</i> (Å)                                          | 10.864(2)                                                                    |
| <i>b</i> (Å)                                          | 5.116(1)                                                                     |
| <i>c</i> (Å)                                          | 12.282(2)                                                                    |
| $\beta$ (°)                                           | 104.53(1)                                                                    |
| <i>V</i> (Å <sup>3</sup> )                            | 660.8(2)                                                                     |
| <i>Z</i>                                              | 2                                                                            |
| F(000)                                                | 396                                                                          |
| D <sub>calc</sub> (g cm <sup>-3</sup> )               | 2.002                                                                        |
| $\mu$ (mm <sup>-1</sup> )                             | 3.240                                                                        |
| T (K)                                                 | 293(2)                                                                       |
| Max $\theta$ (°)                                      | 30                                                                           |
| reflections collected                                 | 6073                                                                         |
| independent reflections                               | 3232                                                                         |
| reflections observed [ $I \geq 2\sigma(I)$ ]          | 2367                                                                         |
| data/restraints/parameters                            | 3232, 0, 204                                                                 |
| flack parameter                                       | Racemic twin, BASF 0.40(4)                                                   |
| final <i>R</i> indices [ $I \geq 2\sigma(I)$ ]        | $R_1 = 0.0298^a$<br>$wR_2 = 0.0727^b$                                        |
| <i>R</i> indices (all data)                           | $R_1 = 0.0438^a$<br>$wR_2 = 0.0756^b$                                        |
| goodness-of-fit <i>S</i> on $F^2$                     | 0.947                                                                        |
| largest difference peak and hole (e Å <sup>-3</sup> ) | 0.475 and -0.572                                                             |

<sup>a</sup>  $R_1 = \Sigma (||F_O| - |F_C||) / \Sigma |F_O|$ . <sup>b</sup>  $wR_2 = [\Sigma w(|F_O| - |F_C|)^2 / \Sigma w|F_O|^2]^{1/2}$

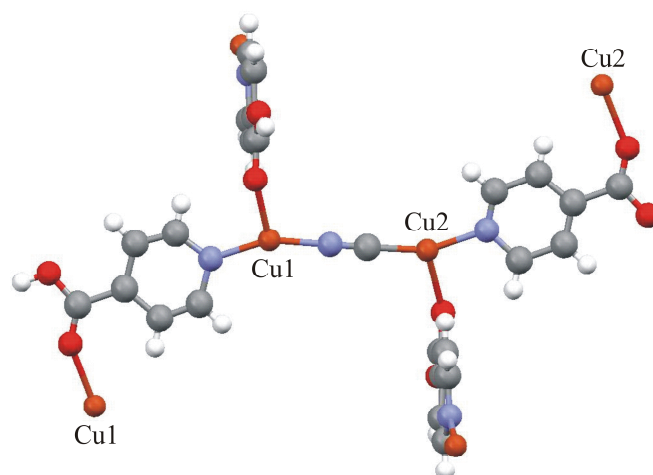

**Figure S1.** Detailed view of the coordination polymer showing the two different coordination environments of the Cu atoms (Cu orange; O red; N blue, C grey, H white).

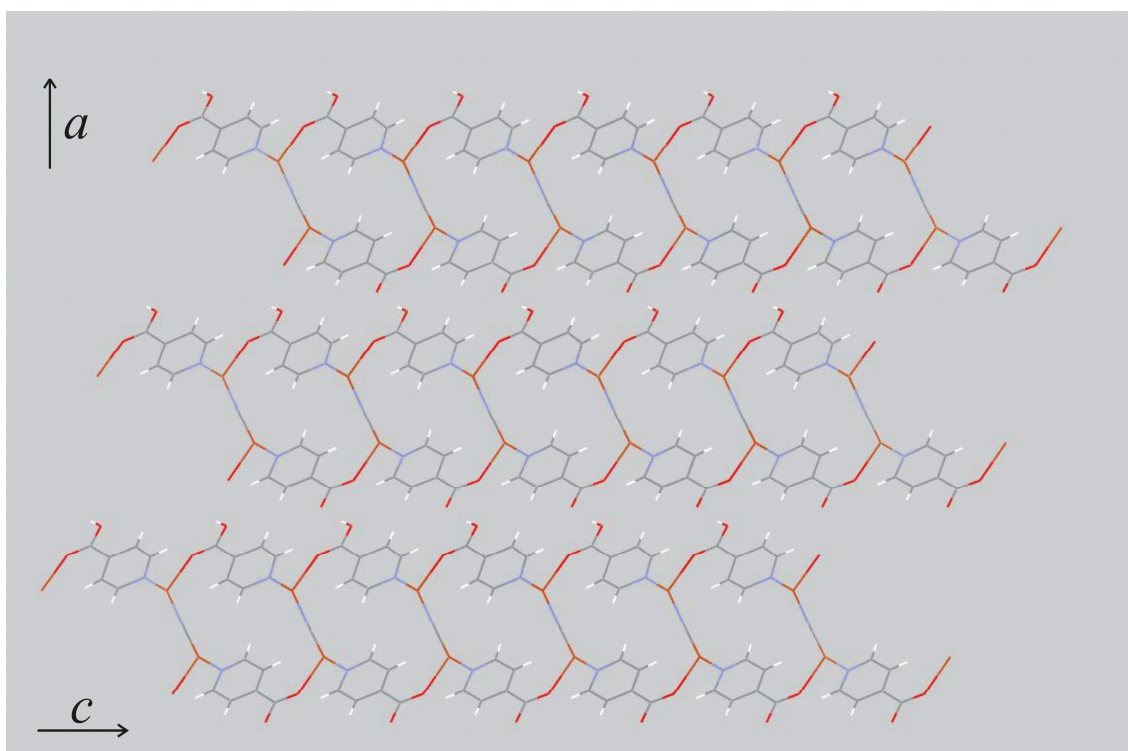

**Figure S2.** View of the hydrogen-bonding between the 2D-threefold interpenetrated networks.

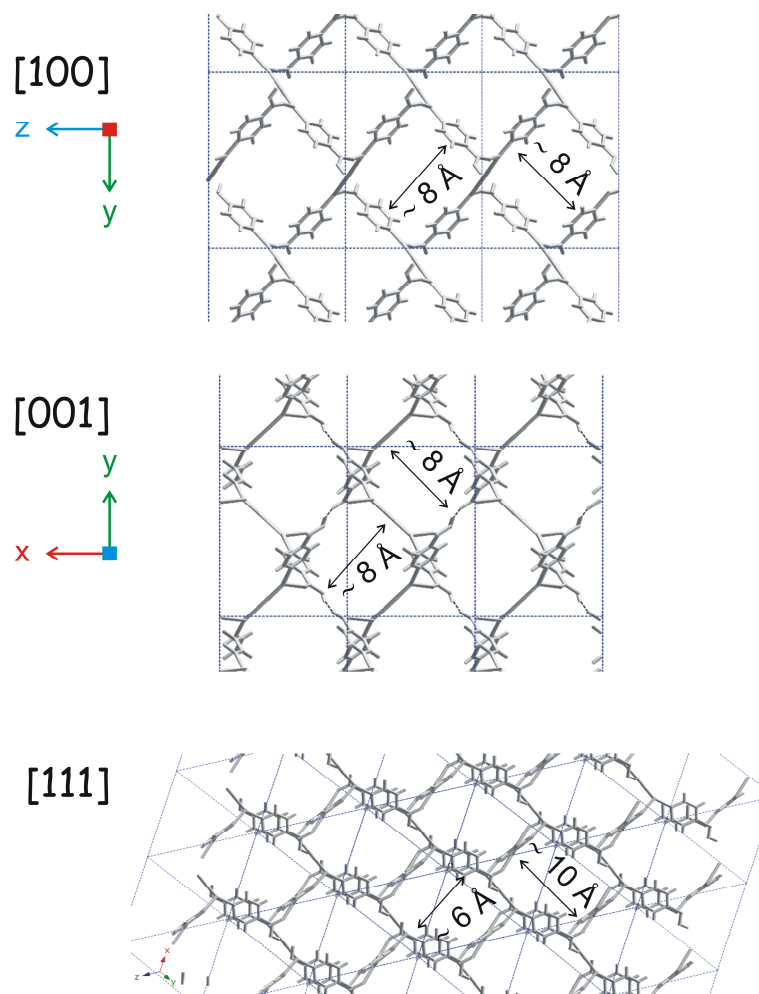

**Figure S3.** Theoretical open framework in the absence of interpenetration.

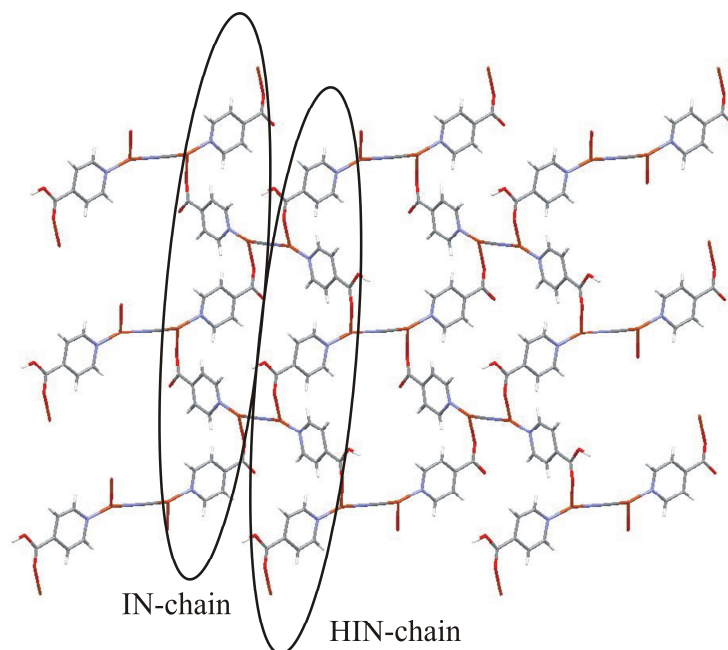

**Figure S4.** Disposition of the HIN (Cu1) and IN (Cu2) chains.

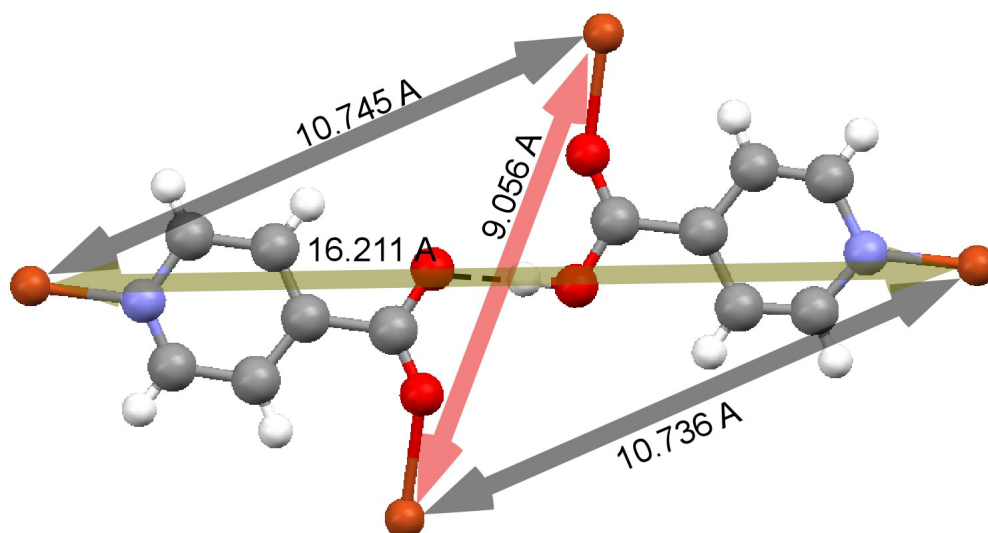

**Figure S5.** Possible connections of the nodes through the hydrogen bonding interaction.

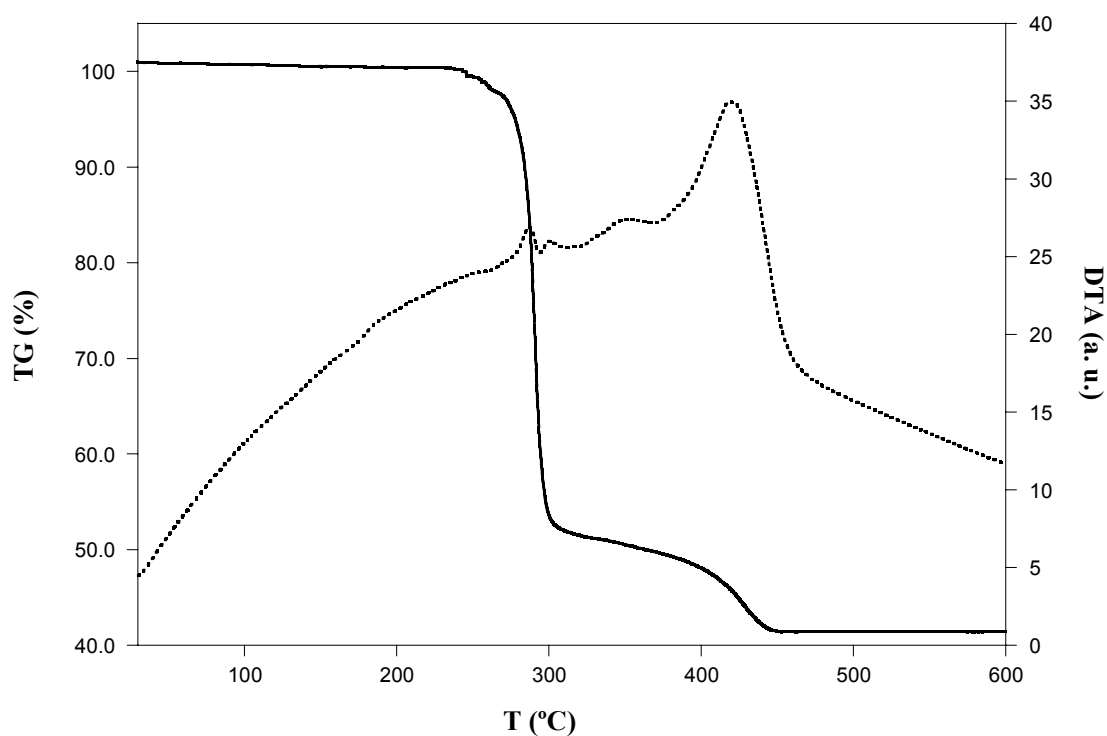

**Figure S6.** Thermal analysis (TG/DTA) were performed on a TA Instruments SDT 2960 thermal analyzer in a synthetic air atmosphere (79 % N<sub>2</sub> / 21 % O<sub>2</sub>) with heating rate of 5 °C min<sup>-1</sup> from room temperature to 600 °C. Residue: Exp. 40.31 %, Calc.(CuO) 39.92 %.
